# Supplementary material for: Akt2 causes TGFβ-induced deptor downregulation facilitating mTOR to drive podocyte hypertrophy and matrix protein expression
Source: PubMed Central journal article supplement (PMC6239304; doi:10.1371/journal.pone.0207285), 2018-11-16

## **Supporting Raw Data**



**Fig. 1D**

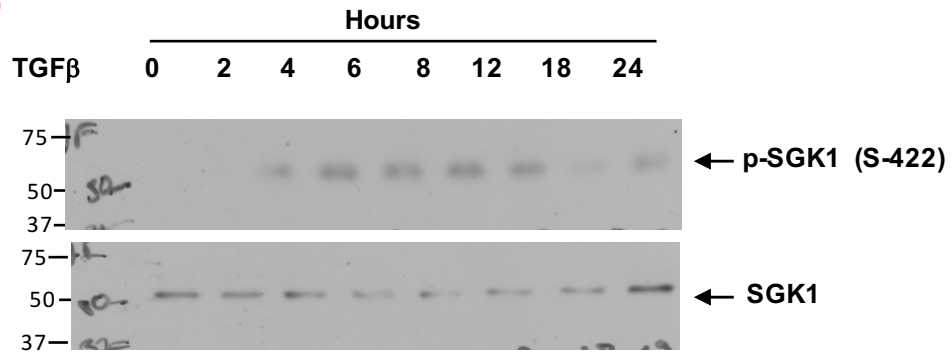

**Fig. 1E**

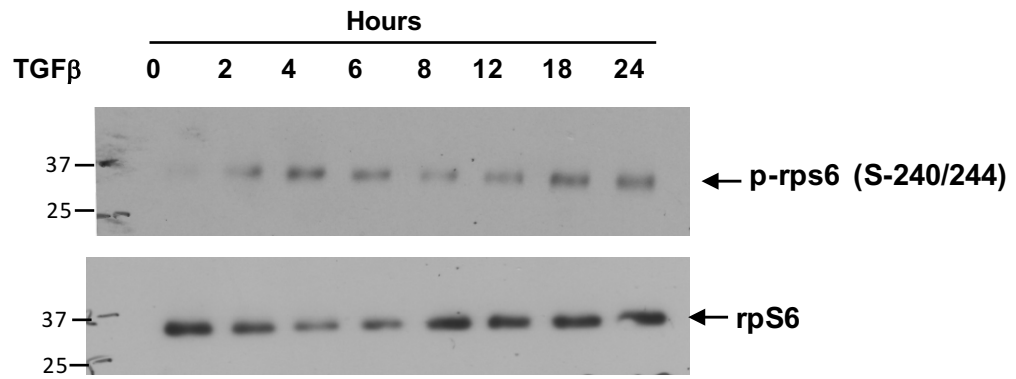

**Fig. 1F**

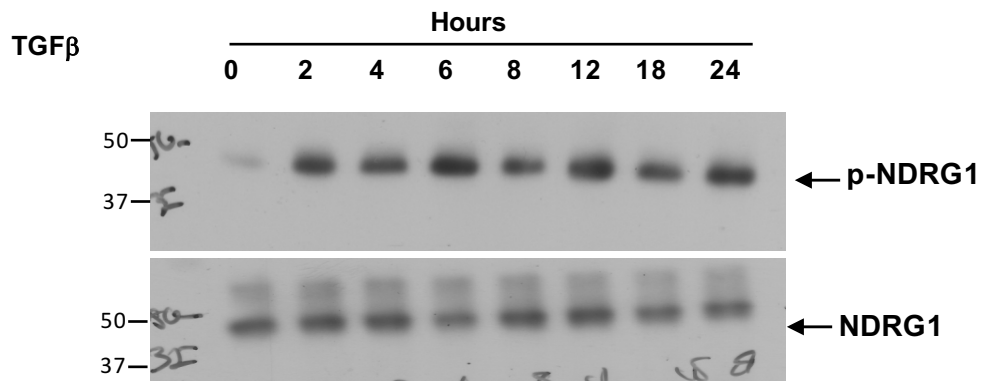

**Fig. 2A**

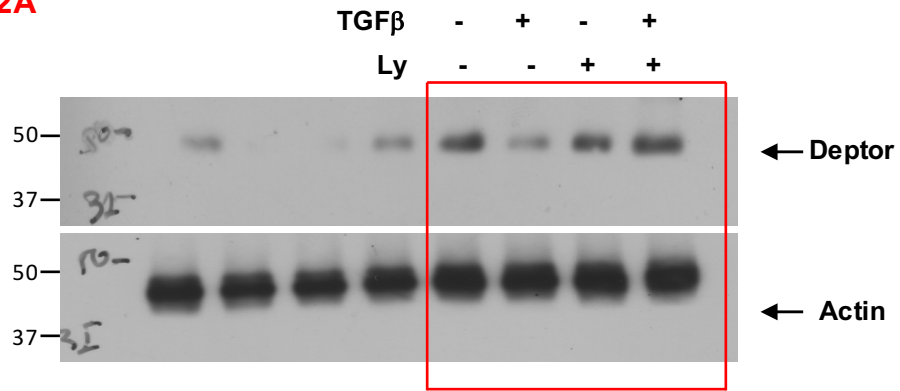

**Fig. 2B**

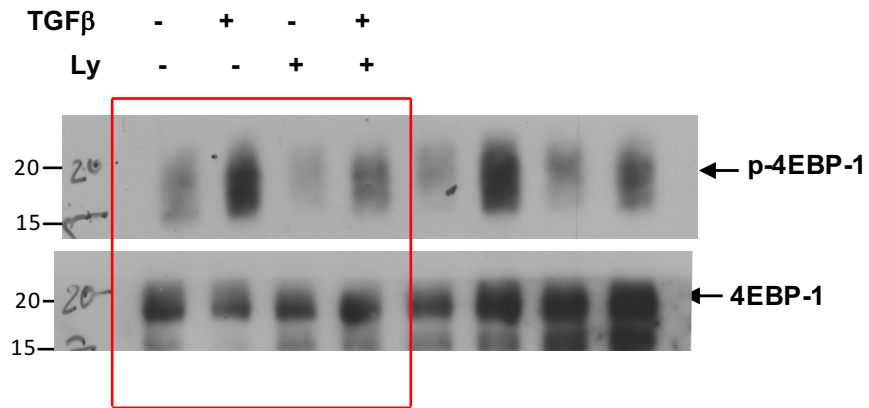

**Fig. 2C**

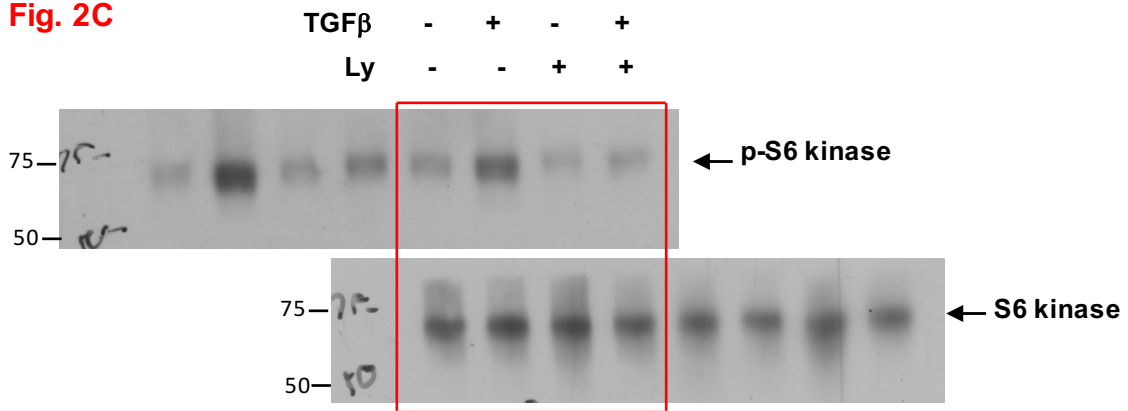



**Fig. 2D**

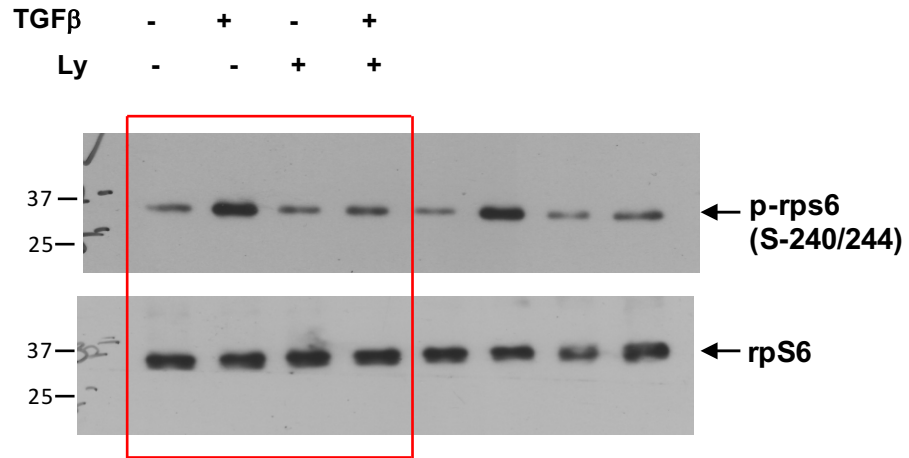

**Fig. 2E**

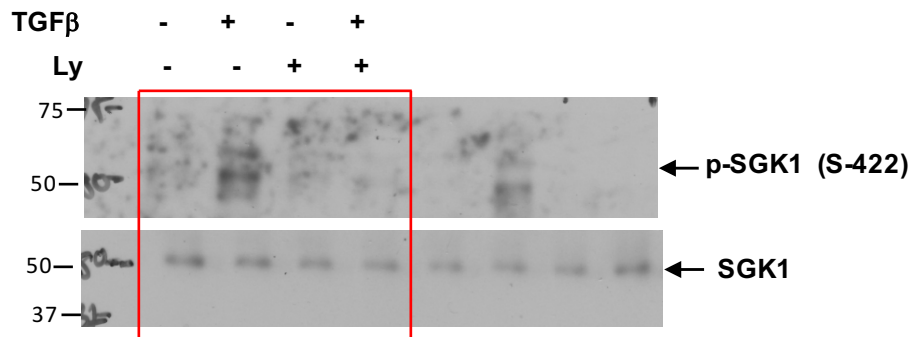

**Fig. 2F**

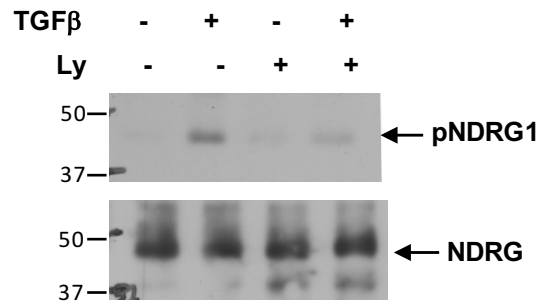

**Fig. 2G**

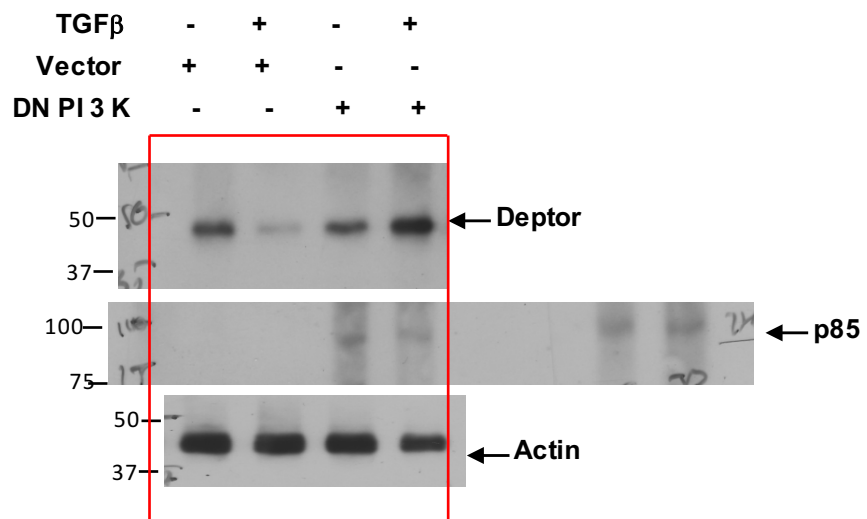

**Fig. 2H**

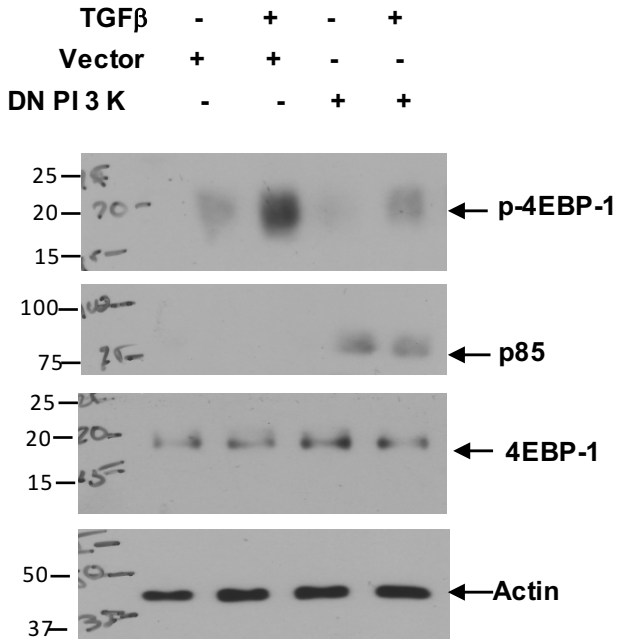

**Fig. 2I**

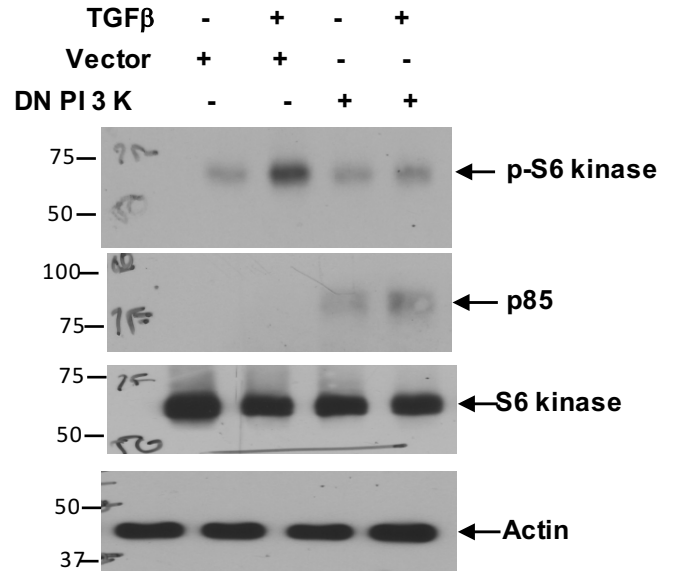

**Fig. 2J**

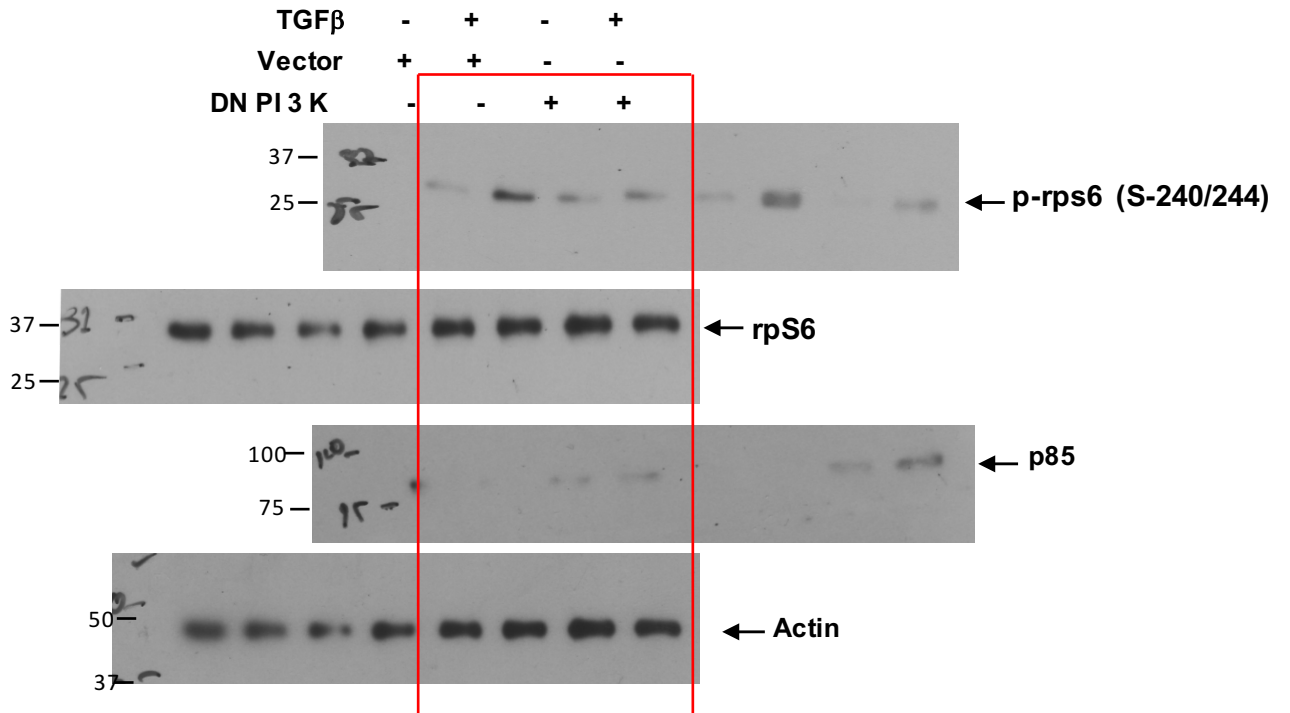

**Fig. 2K**

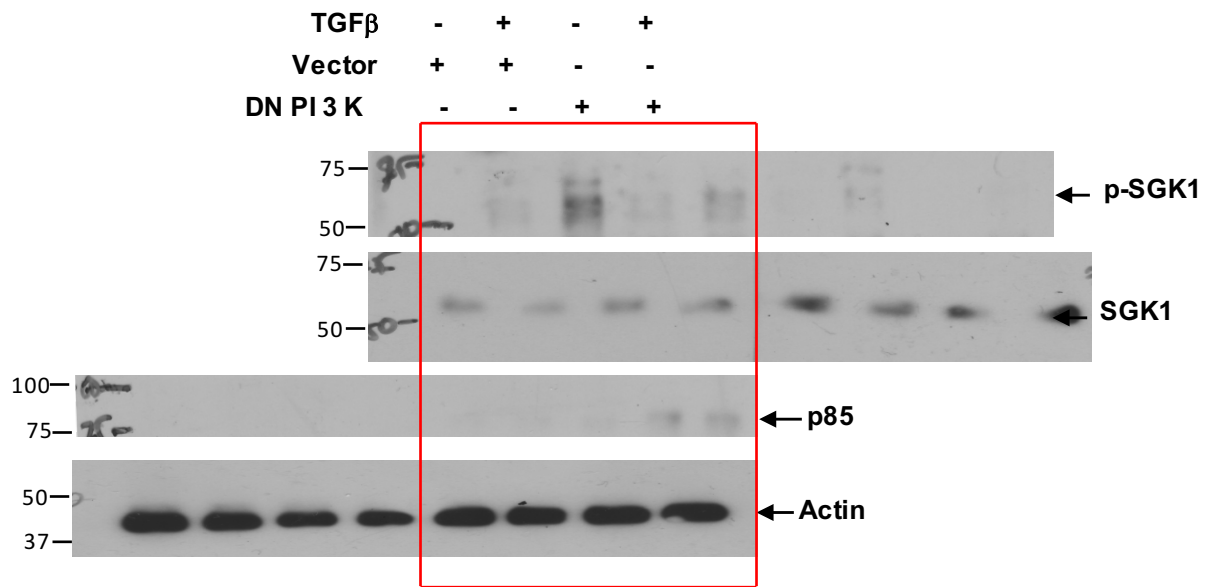

**Fig. 2L**

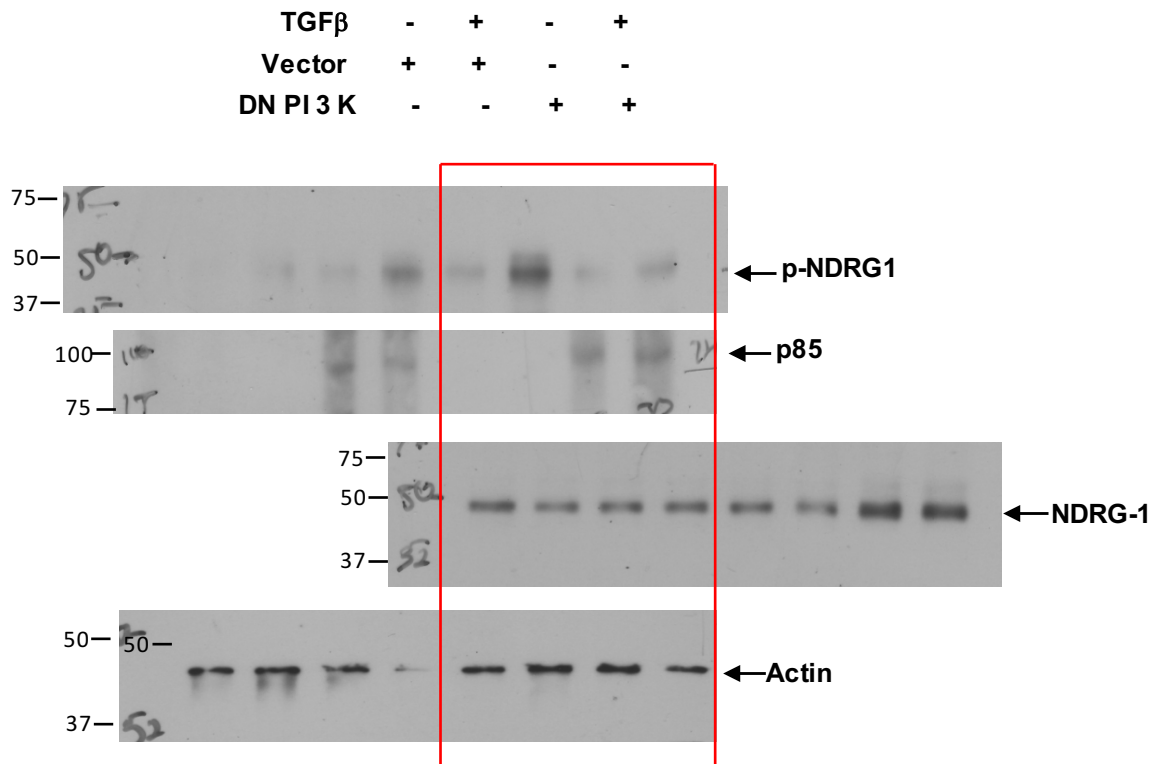

**Fig. 3A**

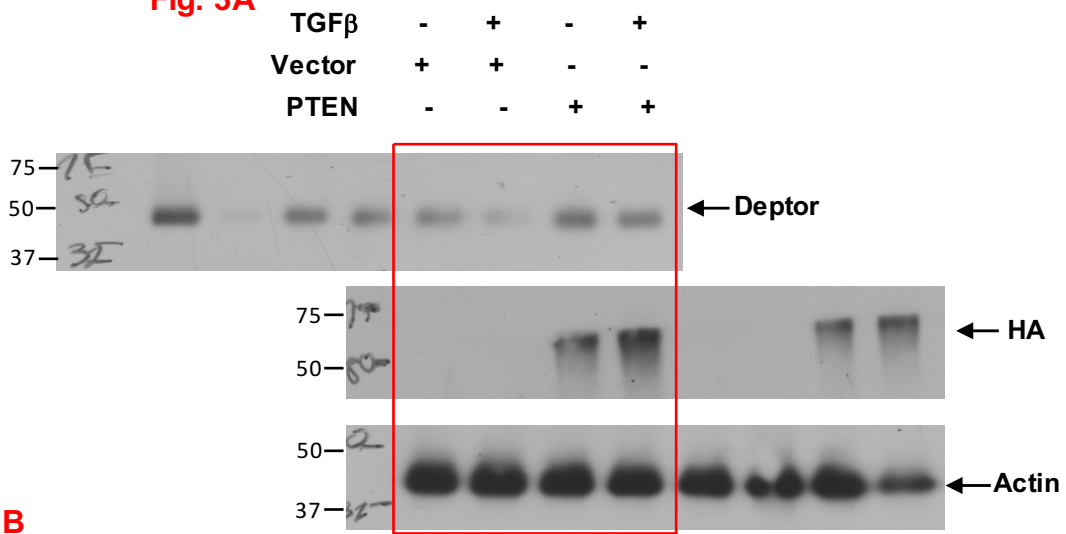

**Fig. 3B**

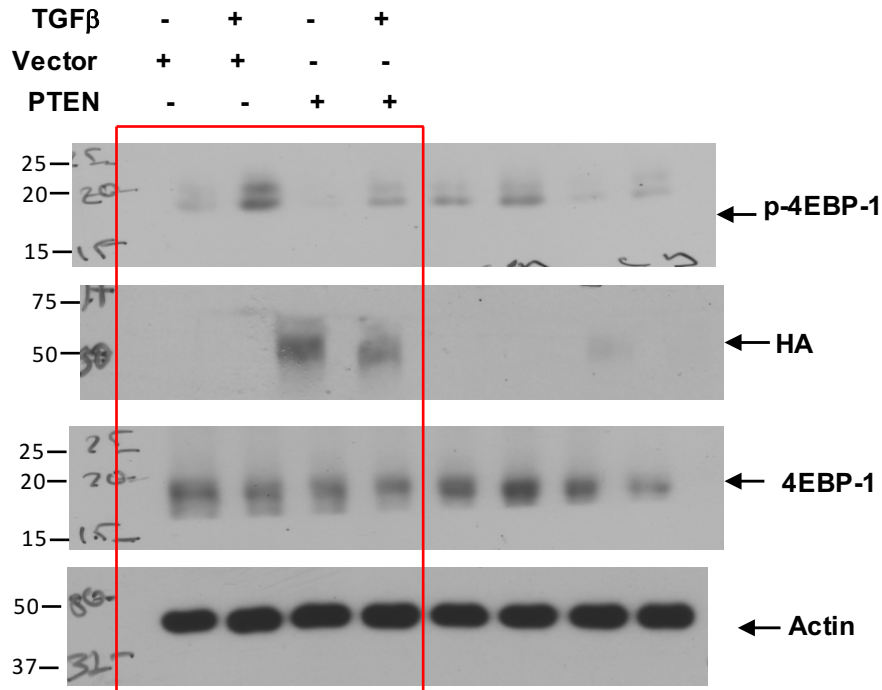

**Fig. 3C**

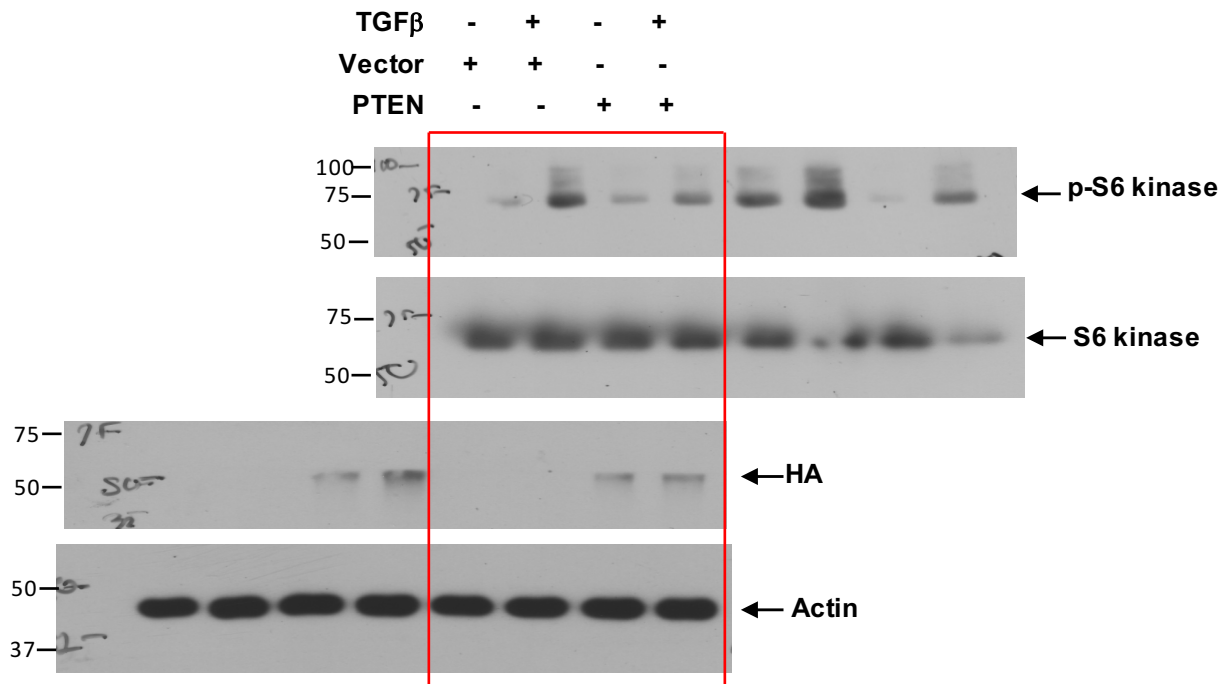

**Fig. 3D**

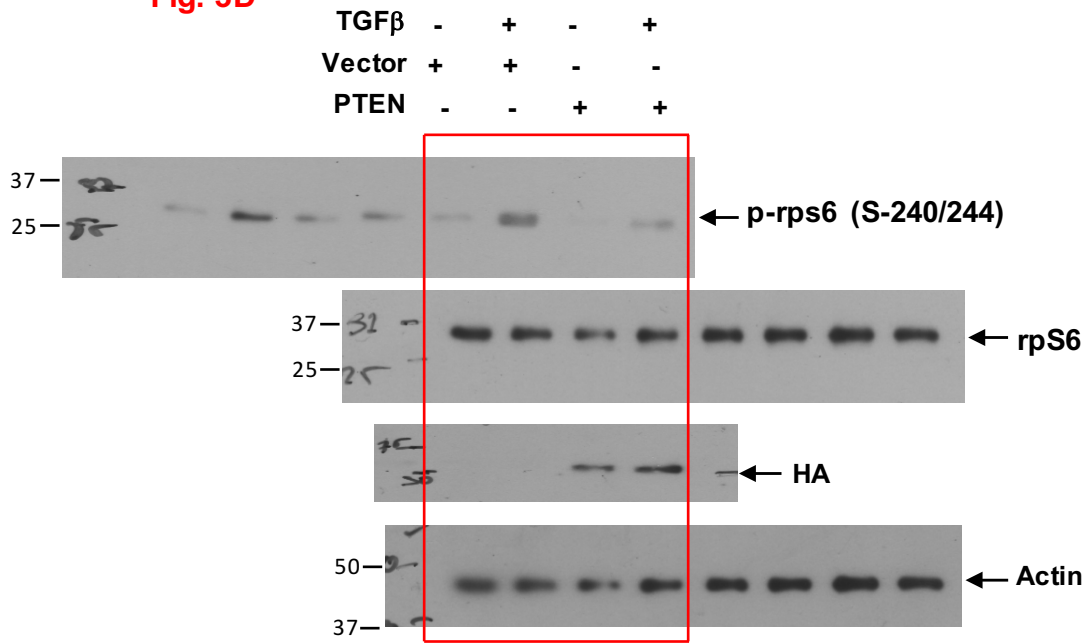

**Fig. 3E**

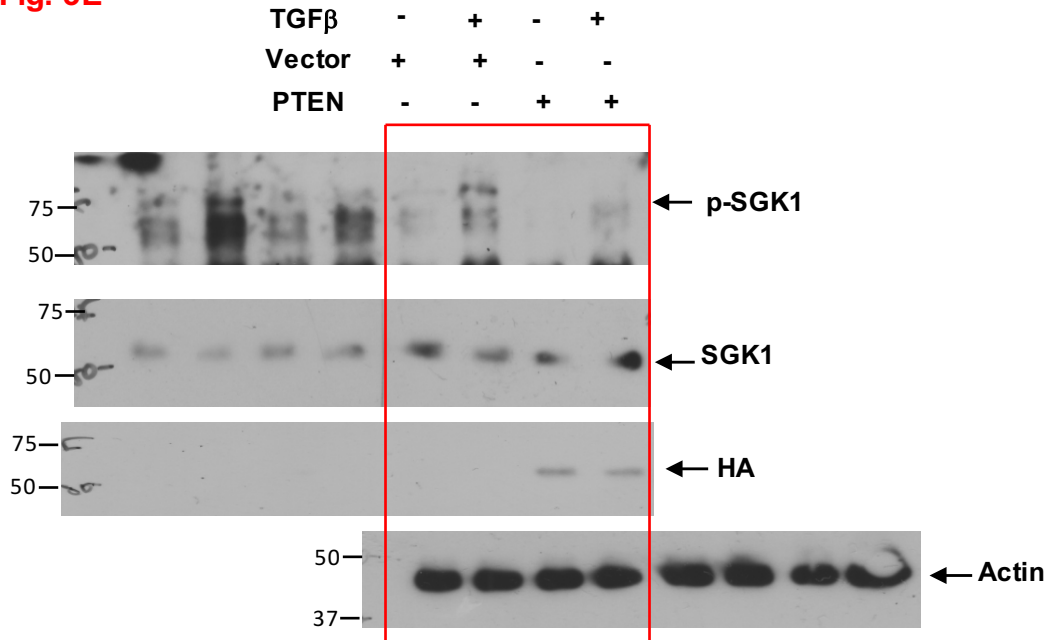

**Fig. 3F**

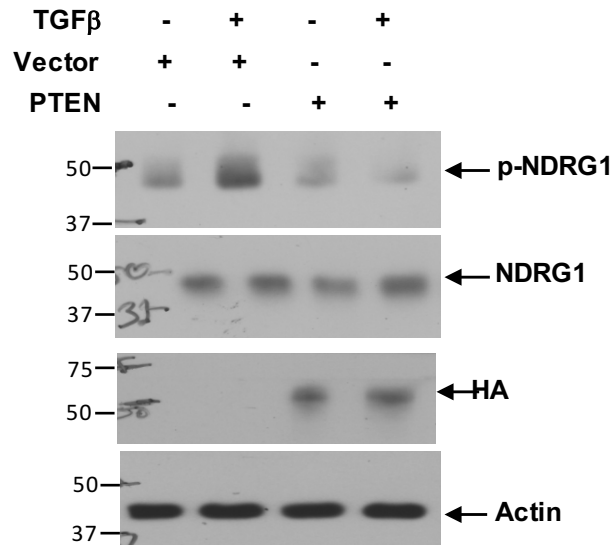

**Fig. 4A**

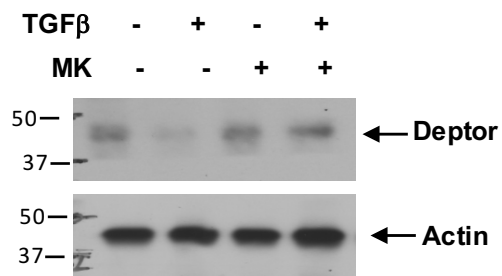

**Fig. 4B**

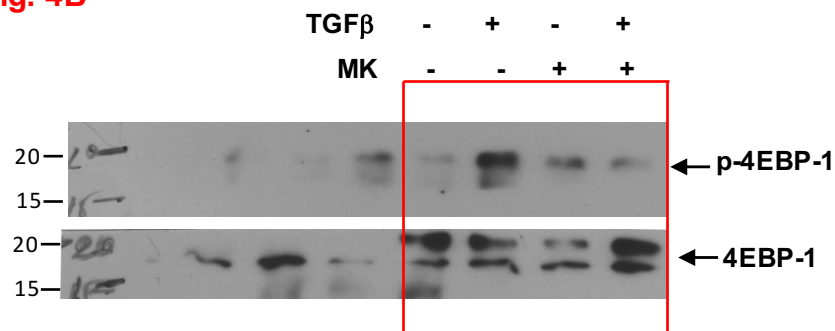

**Fig. 4C**

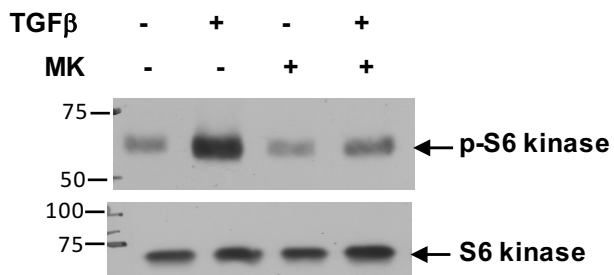

**Fig. 4D**

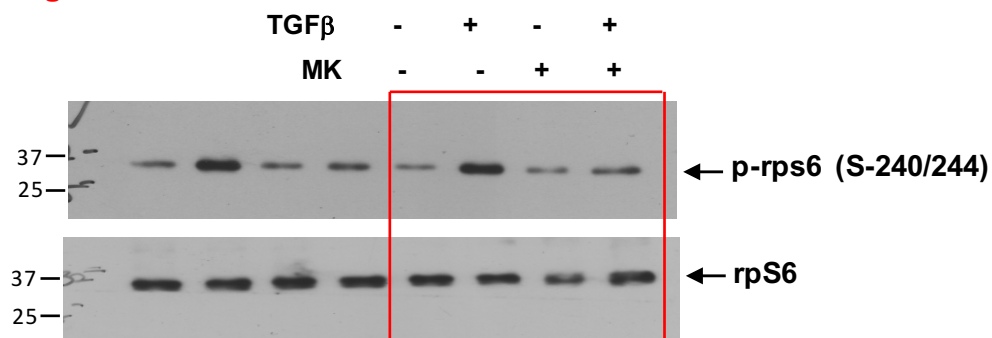

**Fig. 4E**

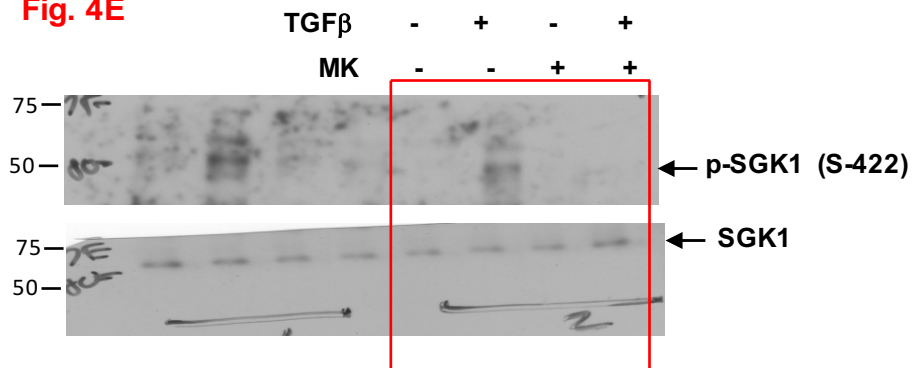

**Fig. 4F**

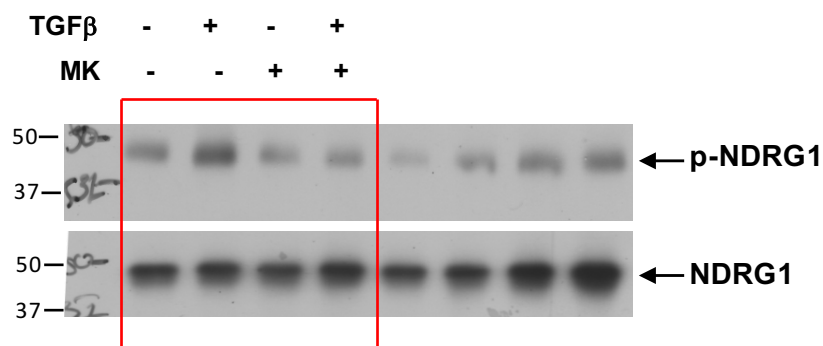

**Fig. 5A**

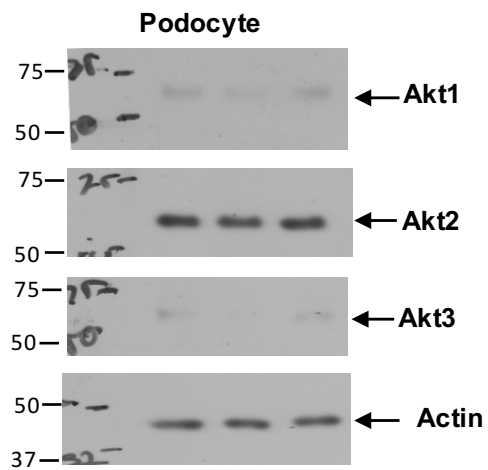

**Fig. 5B**

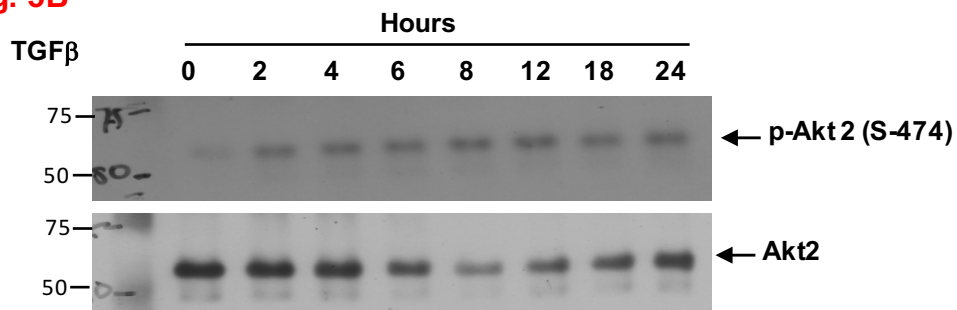

**Fig. 5C**

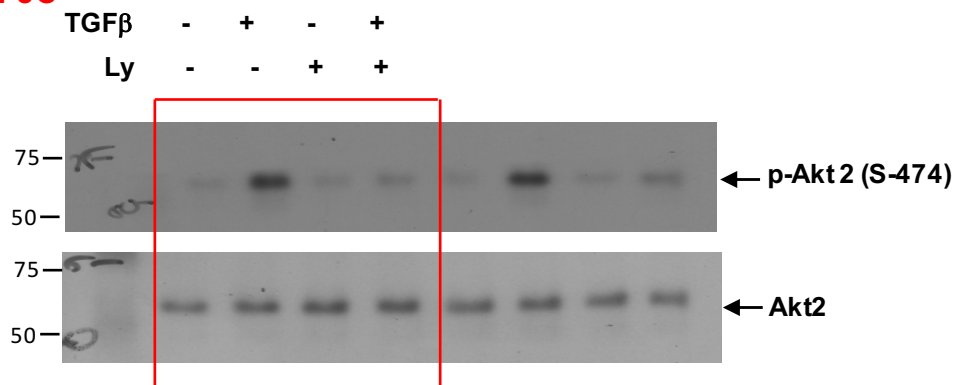

**Fig. 5D**

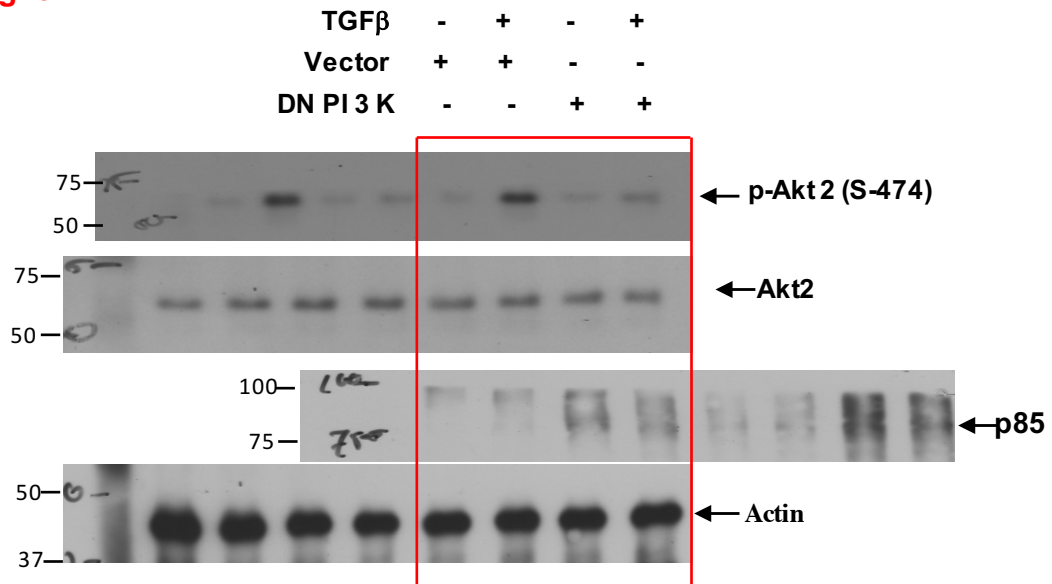

**Fig. 5E**

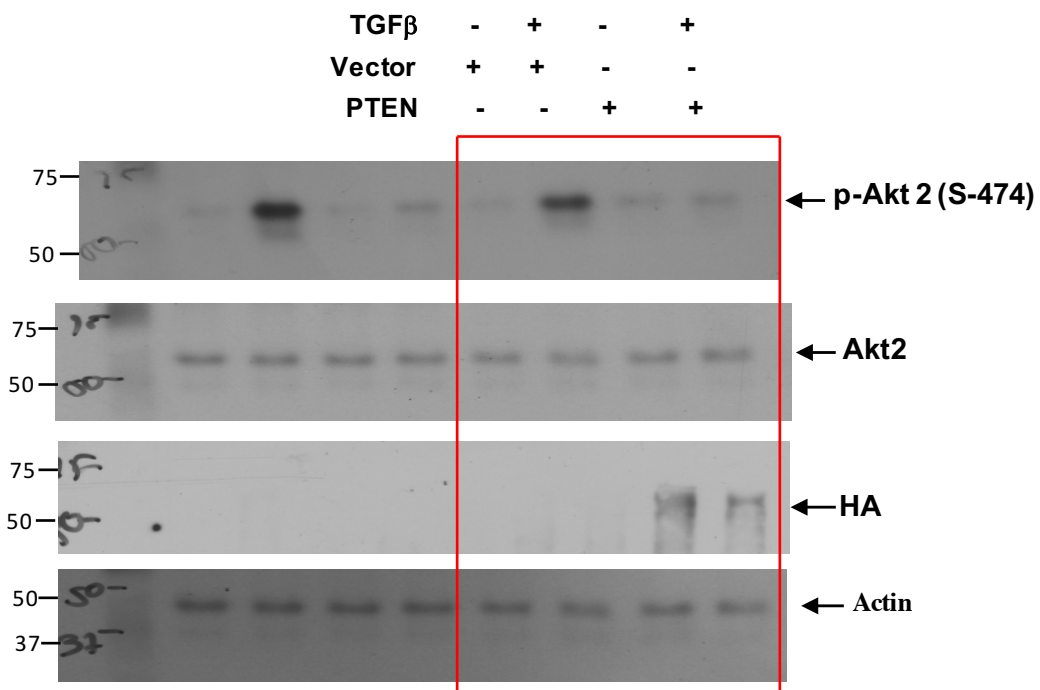



**Fig. 6A**

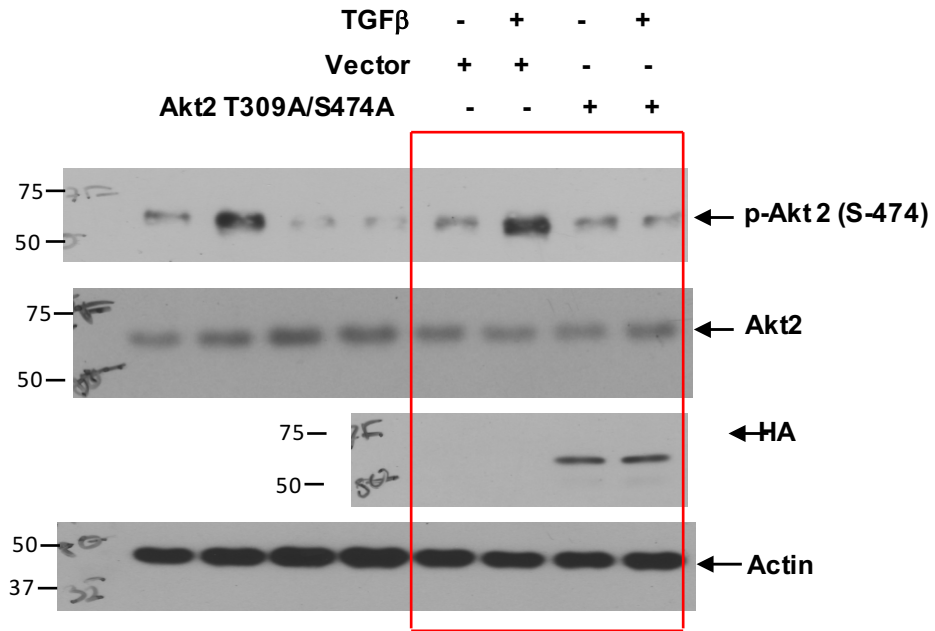

**Fig. 6B**

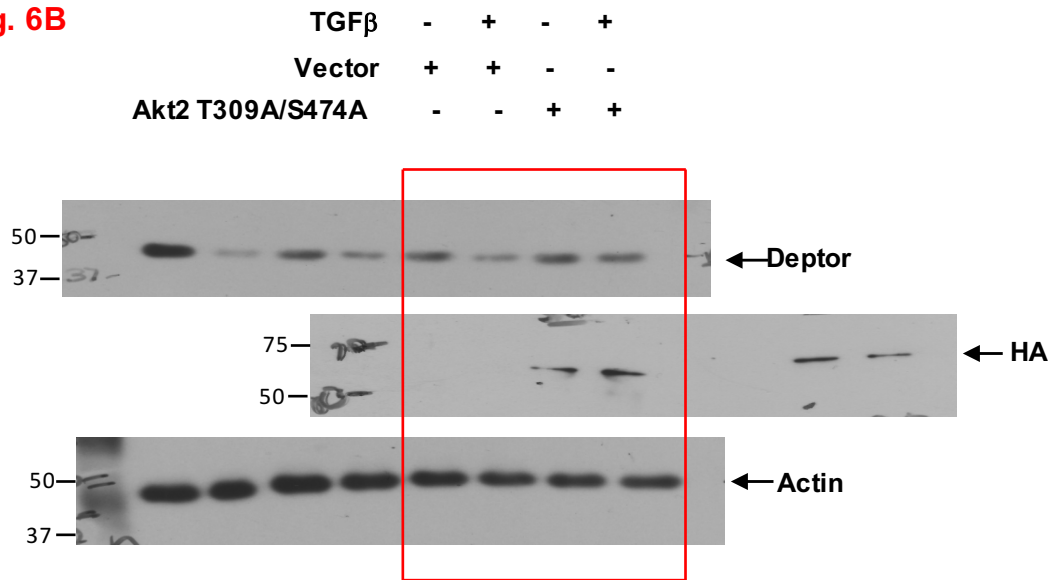

**Fig. 6C**

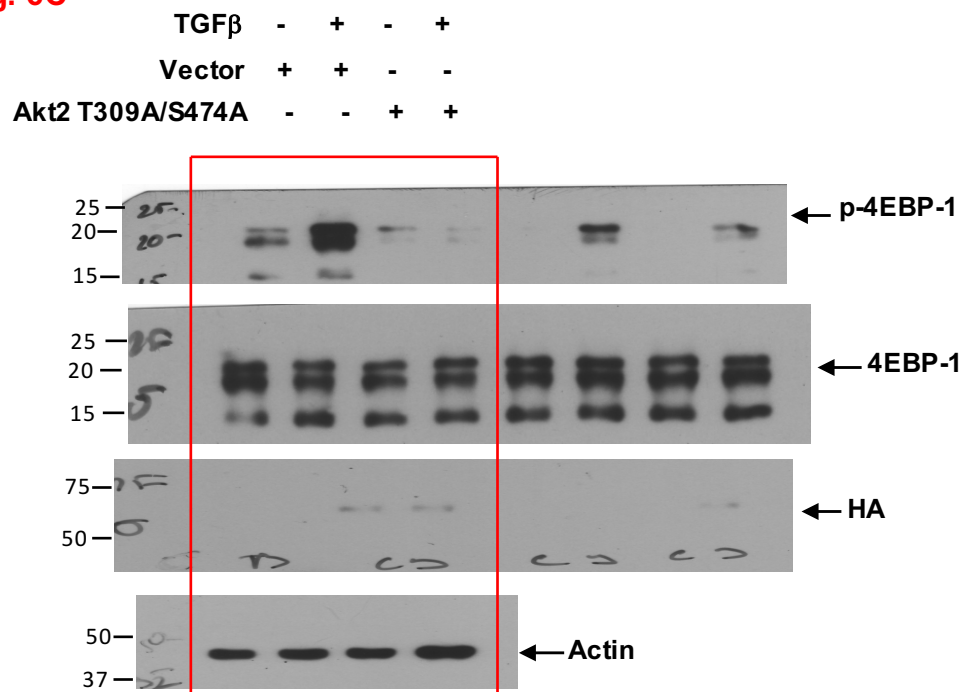

**Fig. 6D**

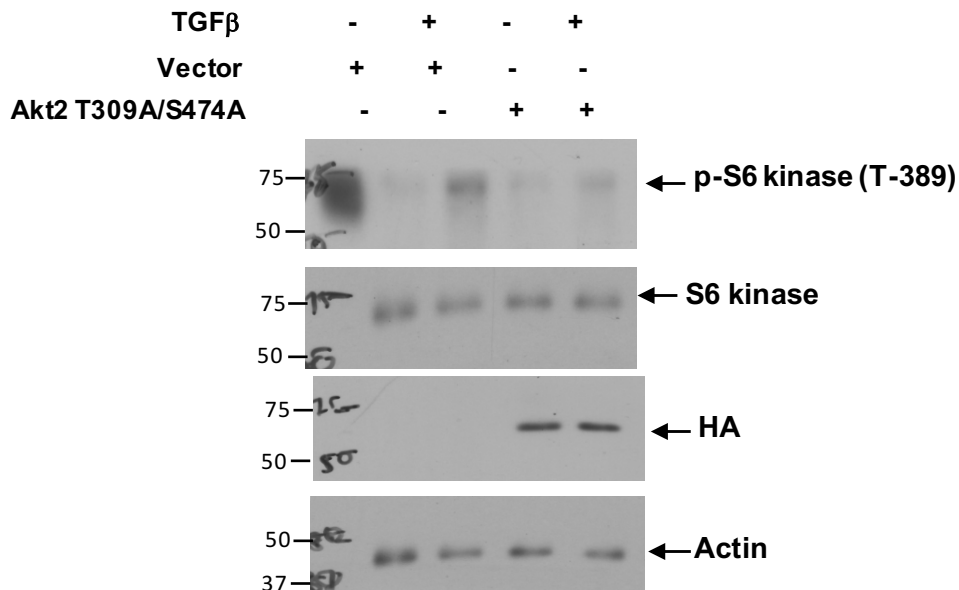

**Fig. 6E**

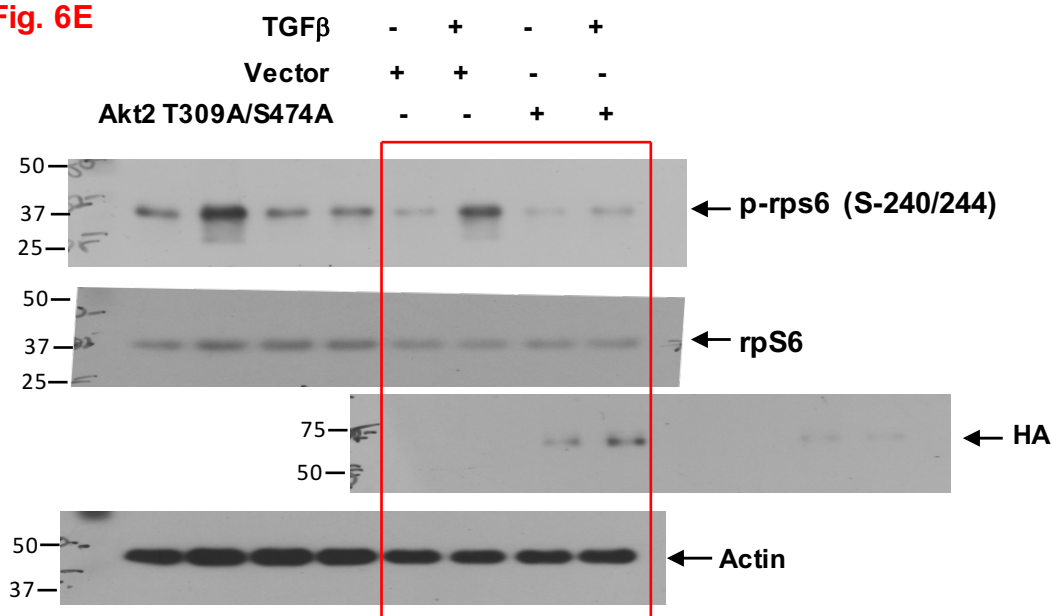

**Fig. 6F**

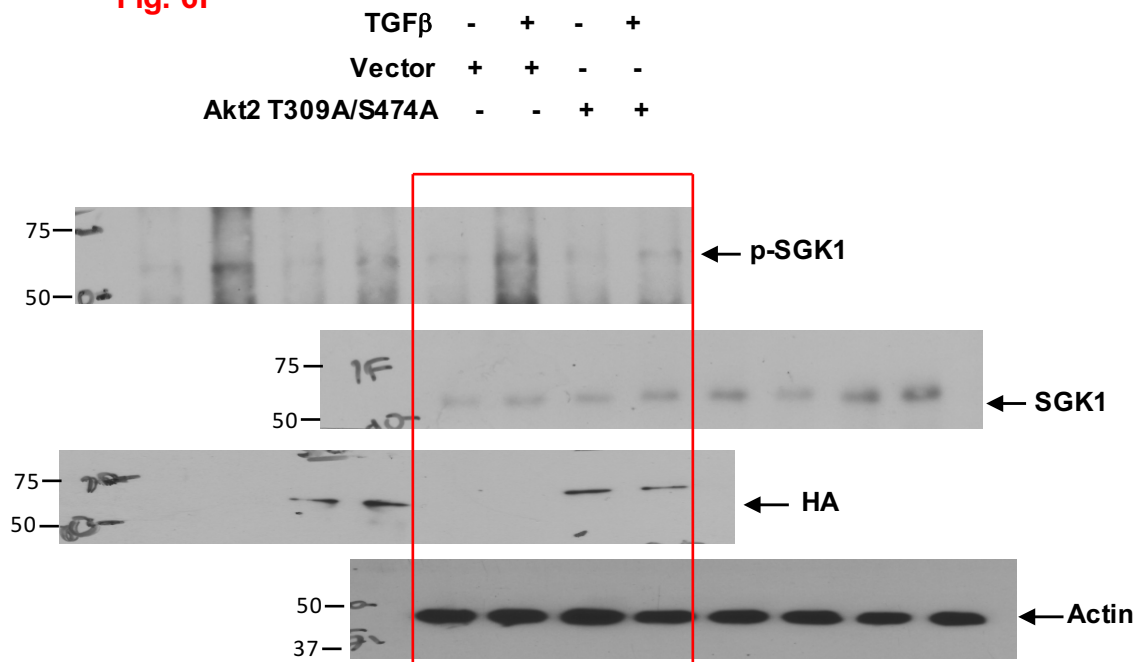

**Fig. 6G**

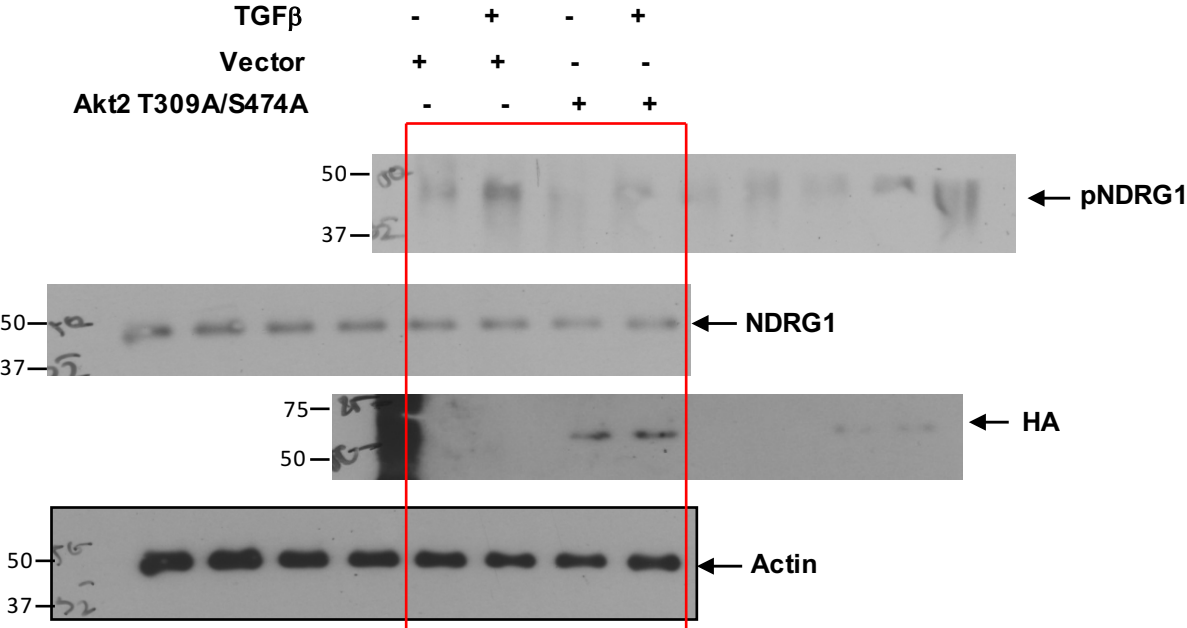

**Fig. 7A**

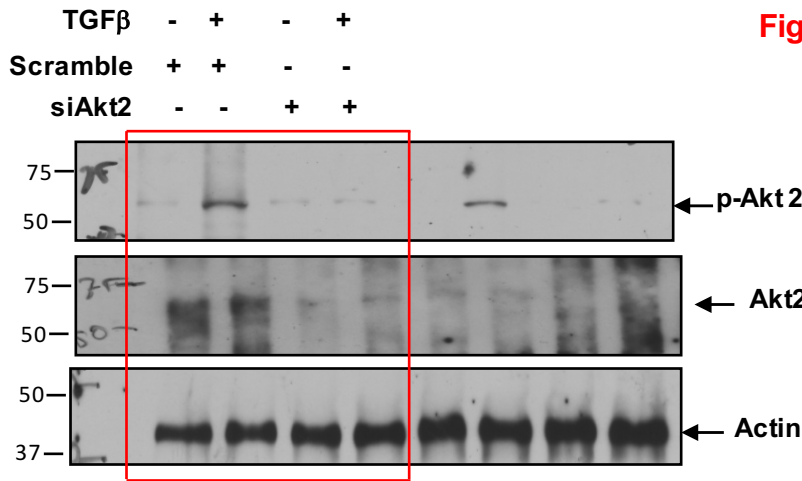

**Fig. 7B**

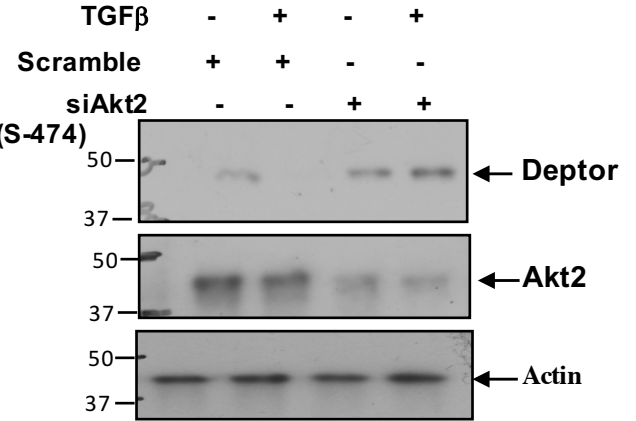

**Fig. 7C**

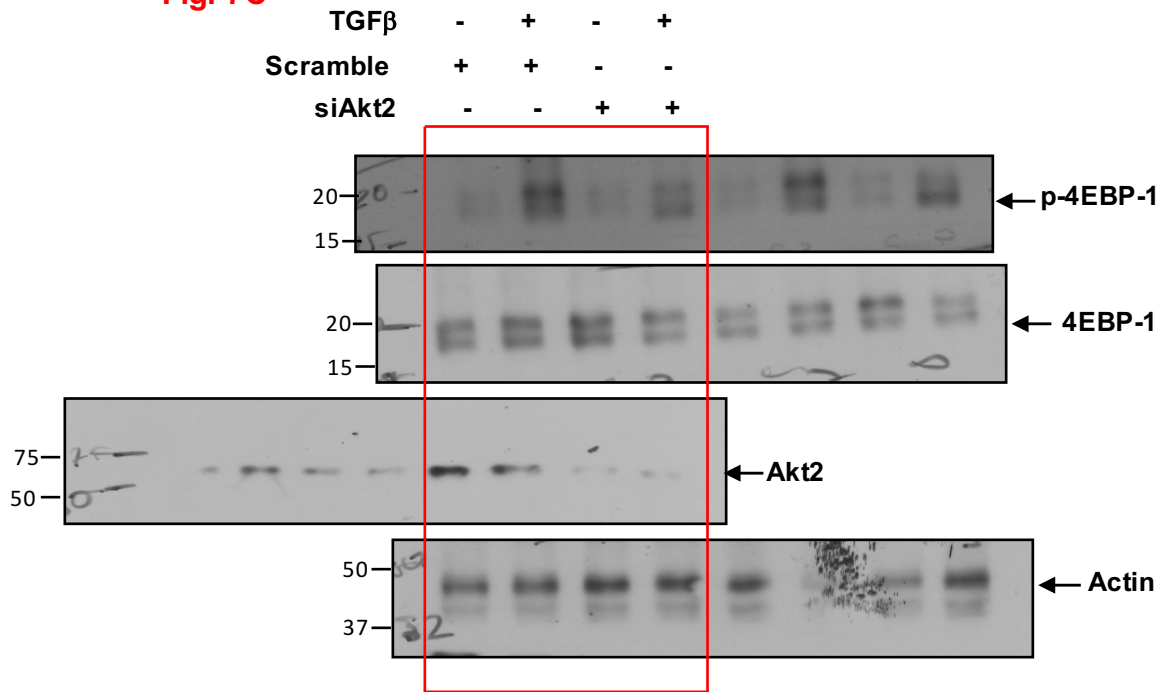

**Fig. 7D**

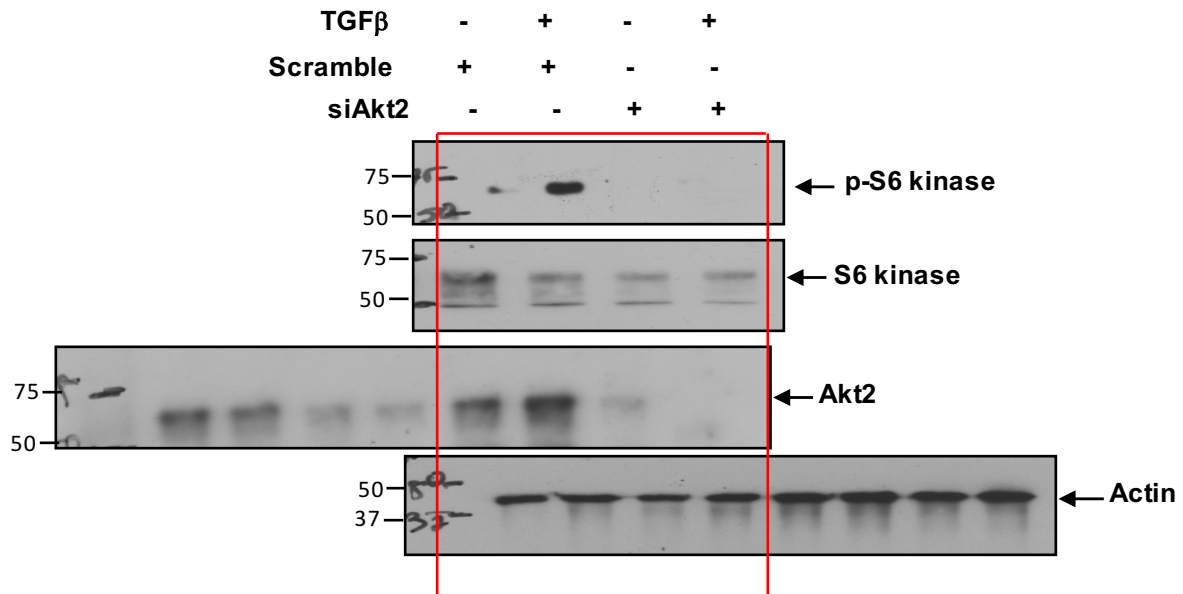

**Fig. 7E**

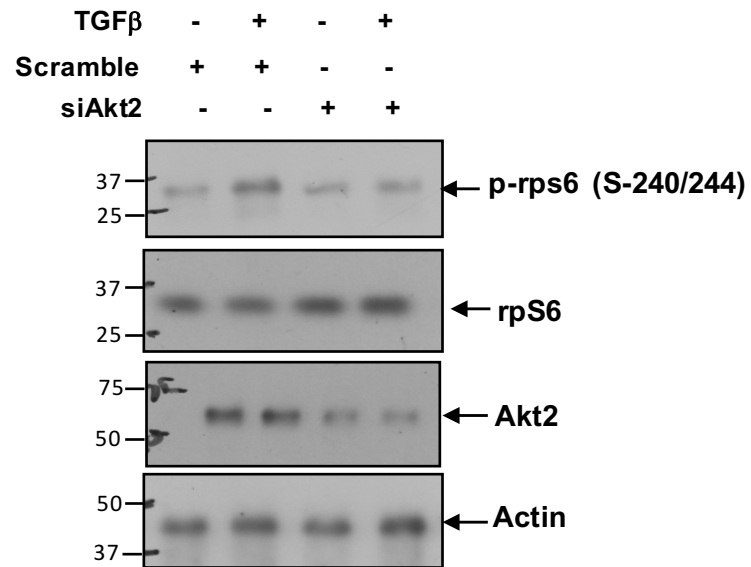

**Fig. 7F**

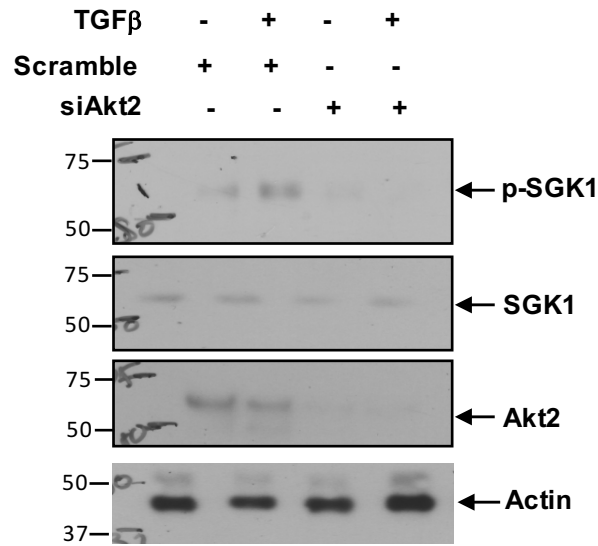

**Fig. 7G**

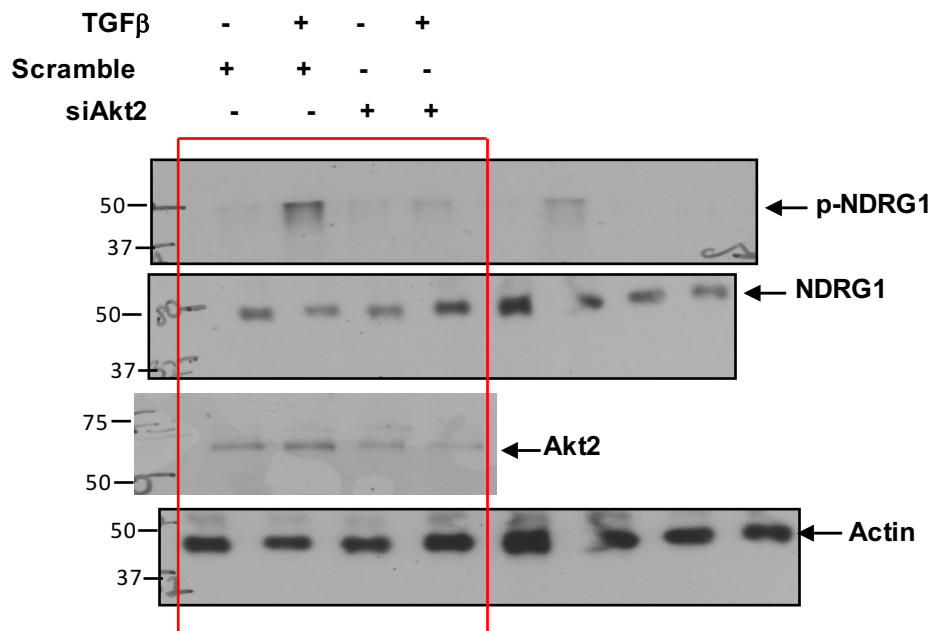

**Fig. 8A**

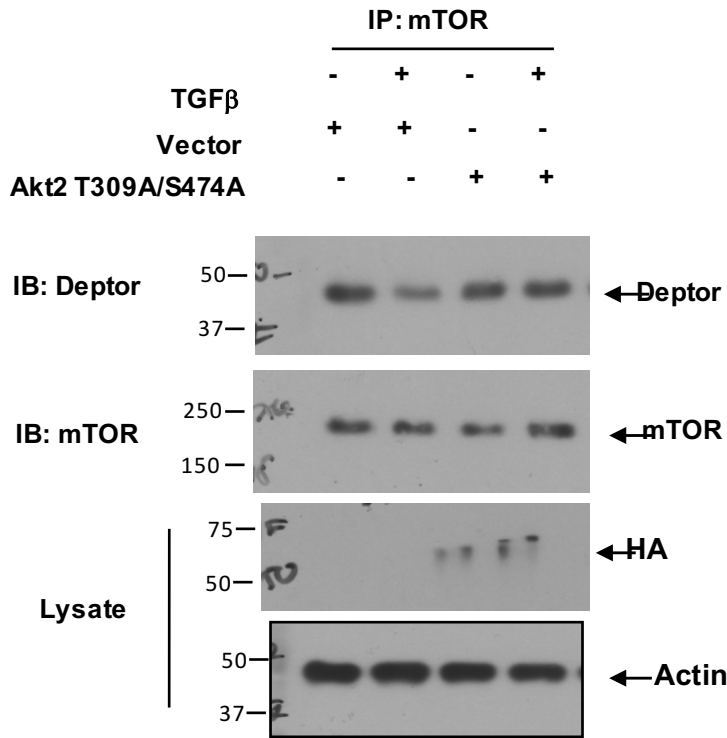

**Fig. 8B**

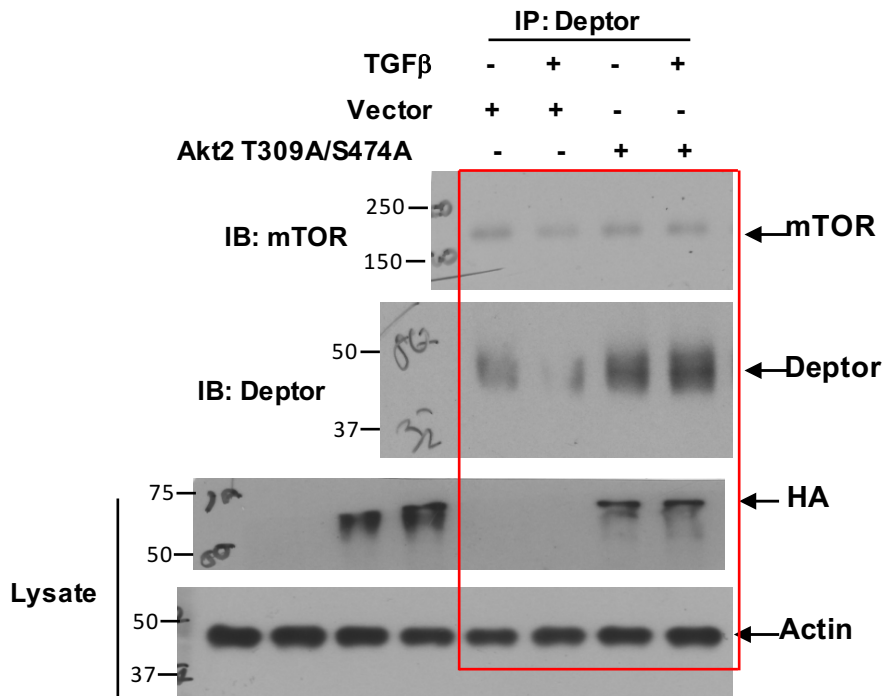

**Fig. 8C**

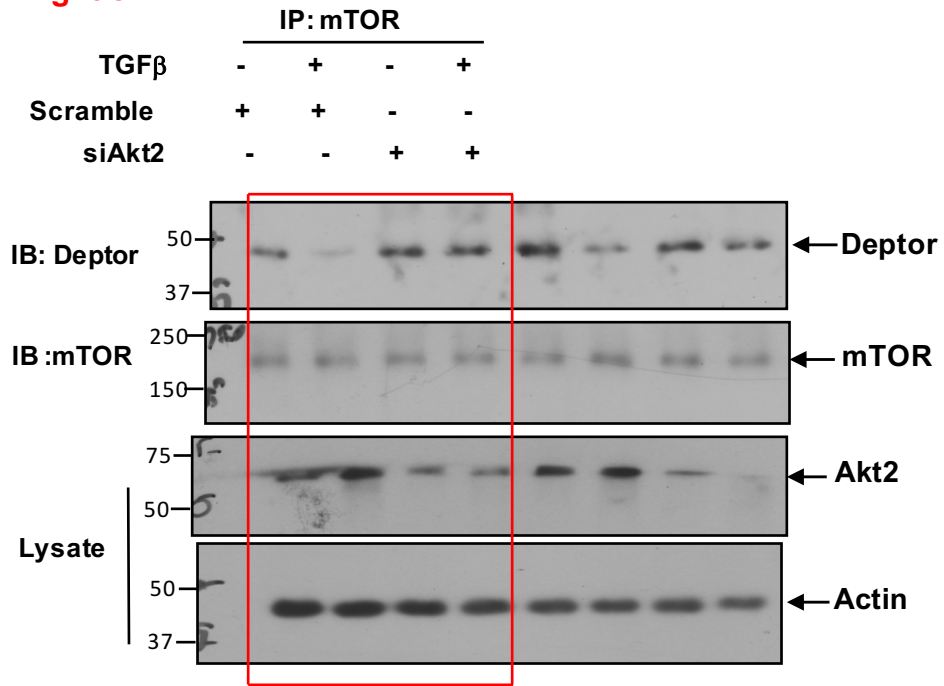

**Fig. 8D**

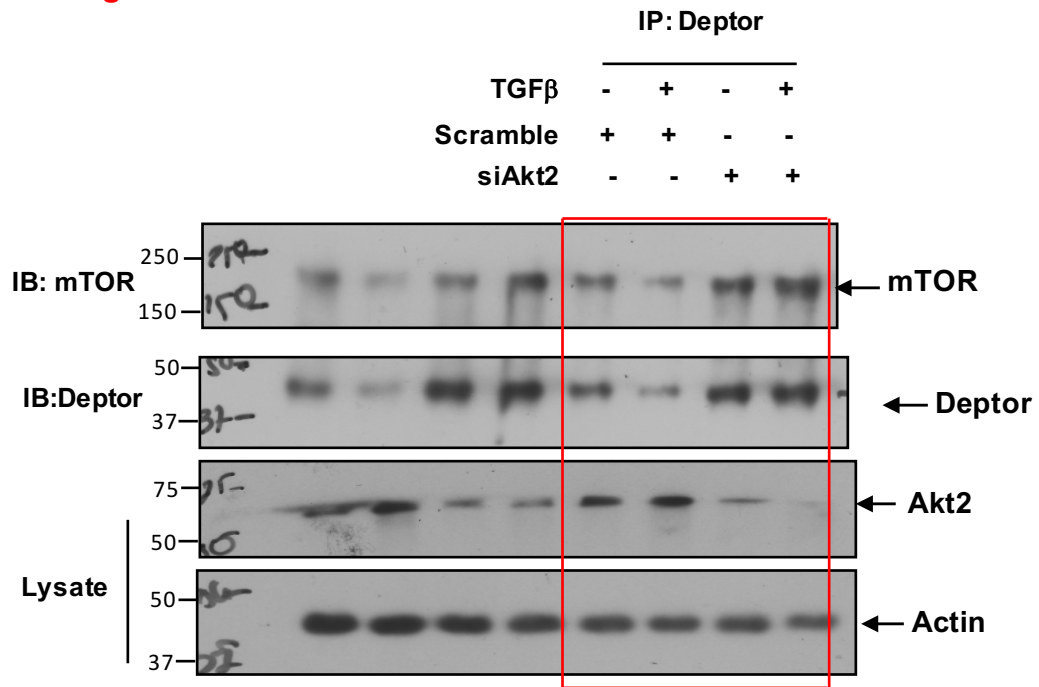

**Fig. 9A bottom panel**

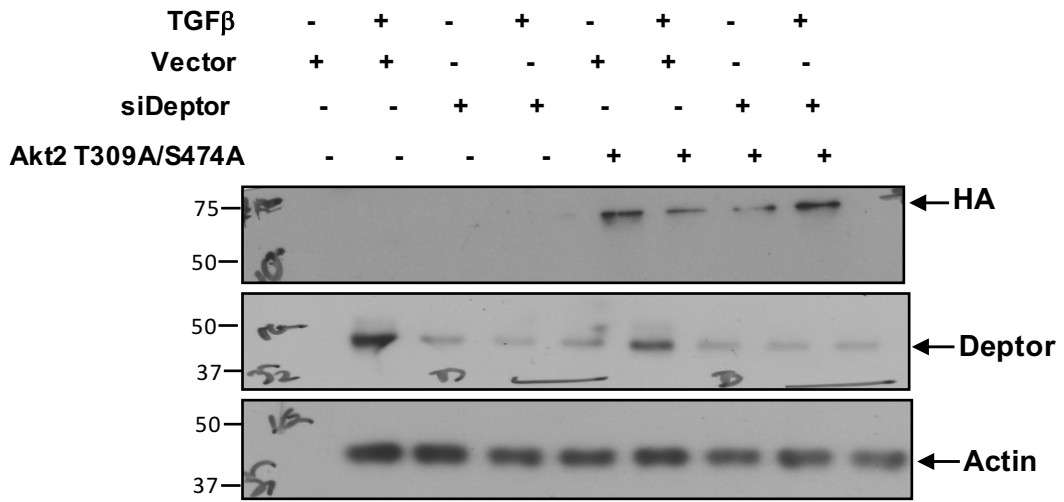

**Fig. 9B bottom panel**

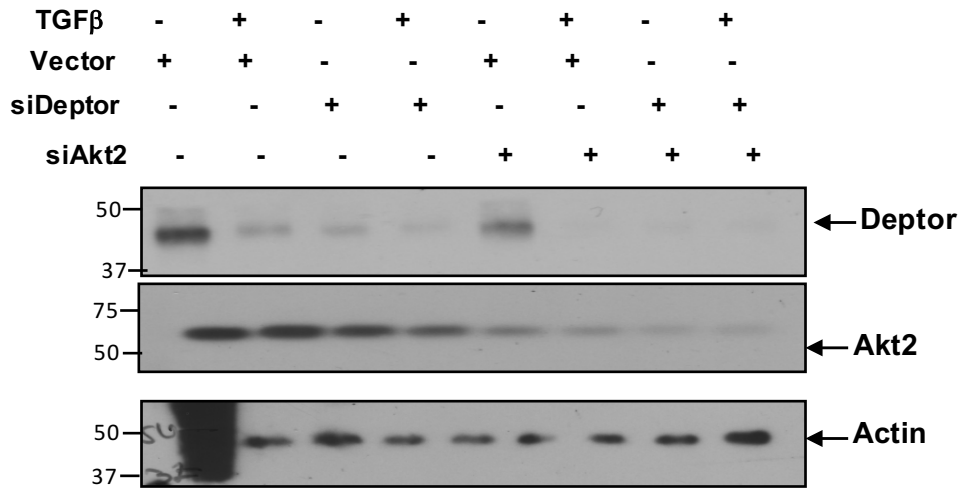



**Fig. 9C**

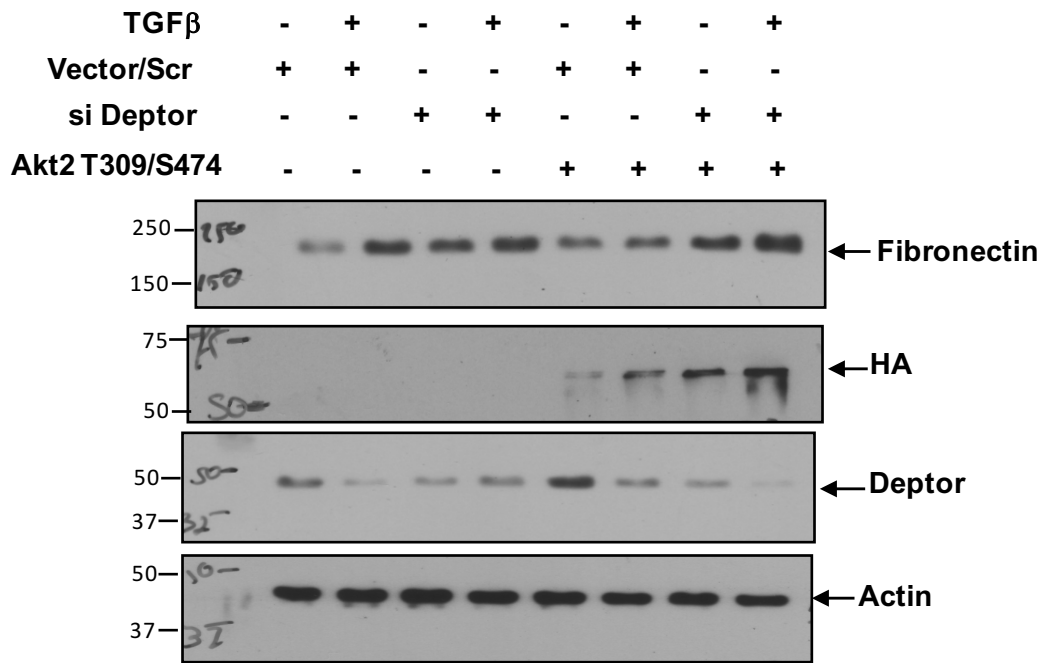

**Fig. 9D**

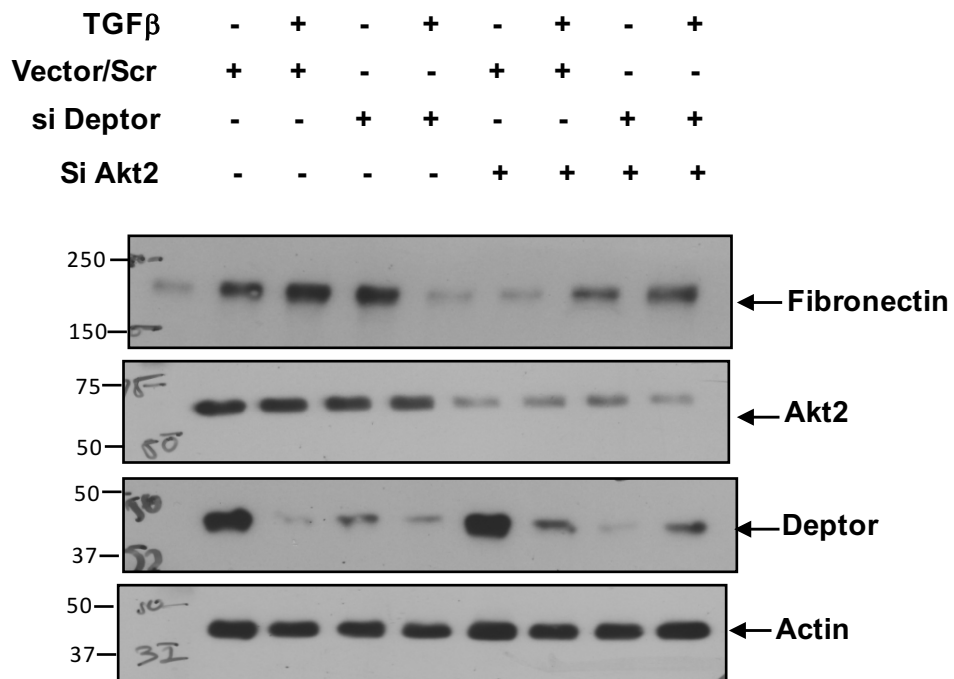

**Fig. 10A**

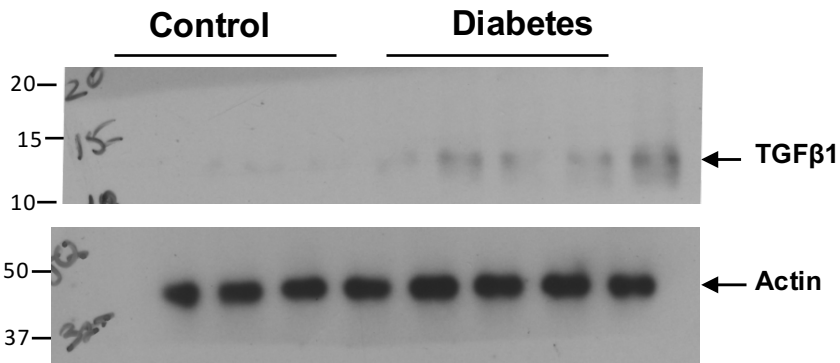

**Fig. 10C**

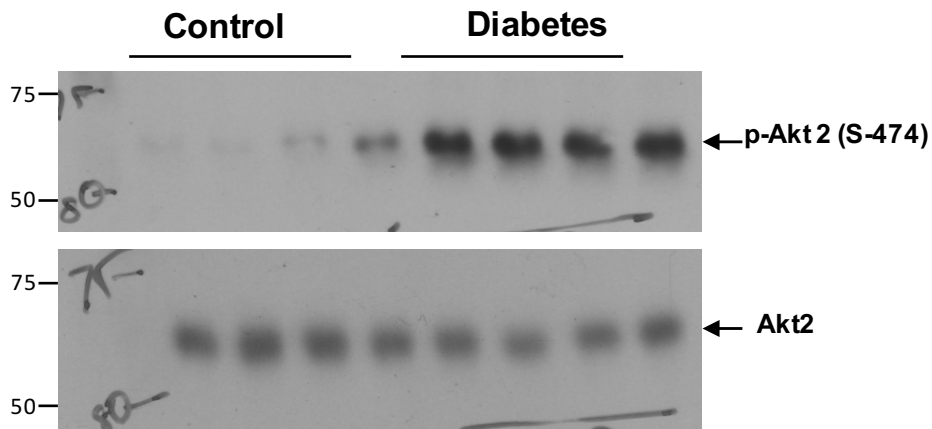

**Fig. 10E**

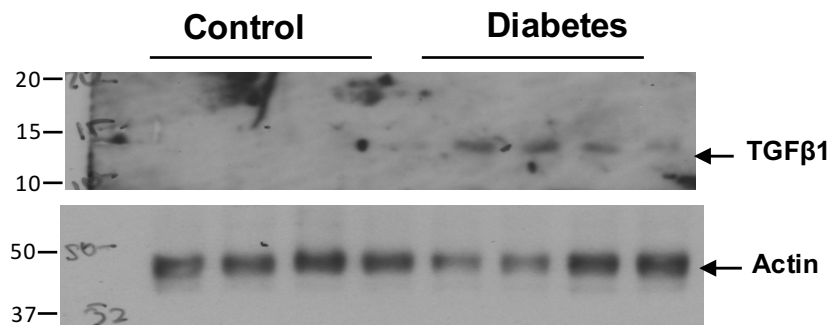

**Fig. 10G**

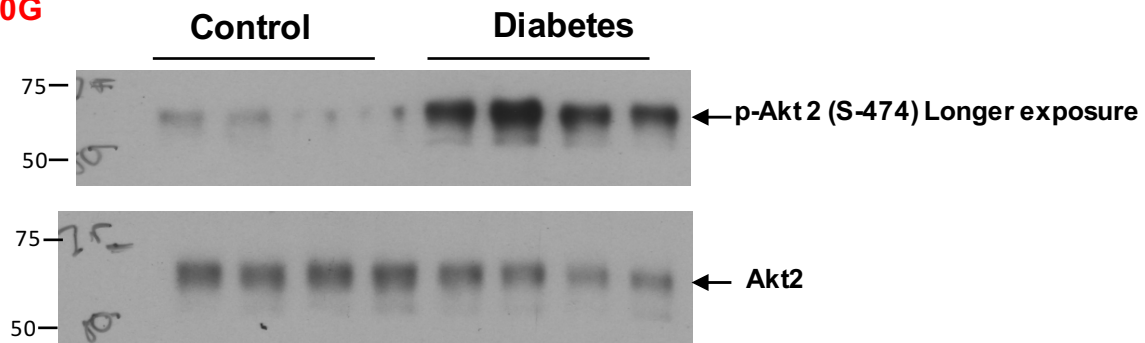

**S1A Fig**

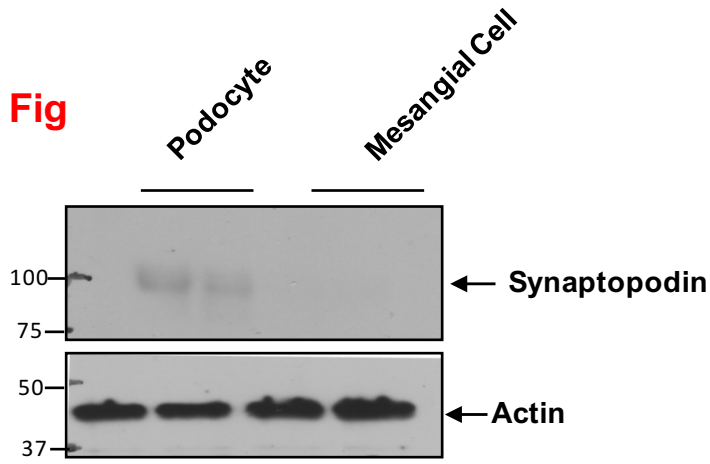

**S1B Fig.**

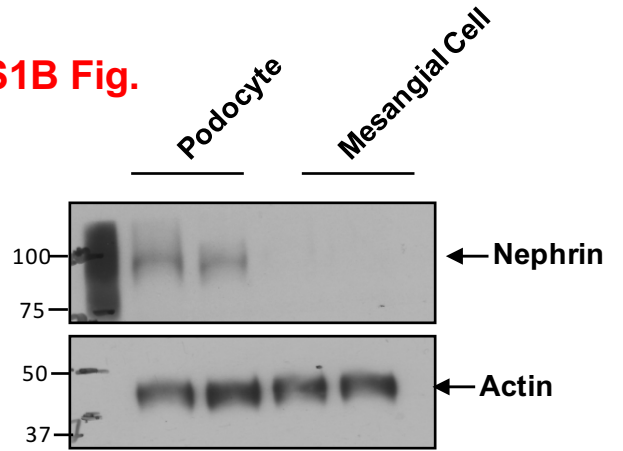

**S6A Fig.**

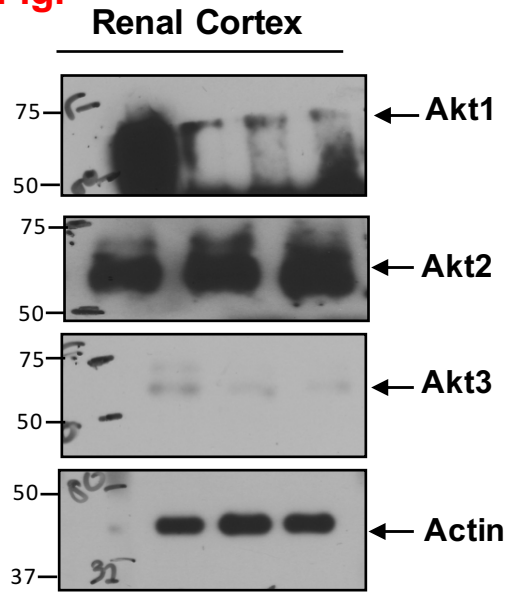

**S6B Fig.**

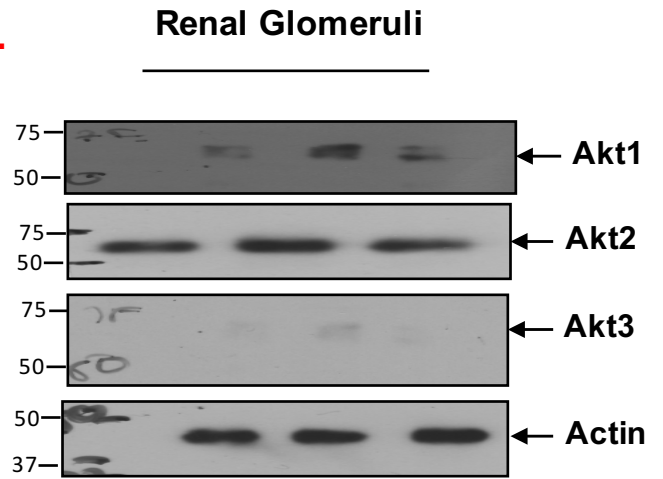

**S8 Fig.**

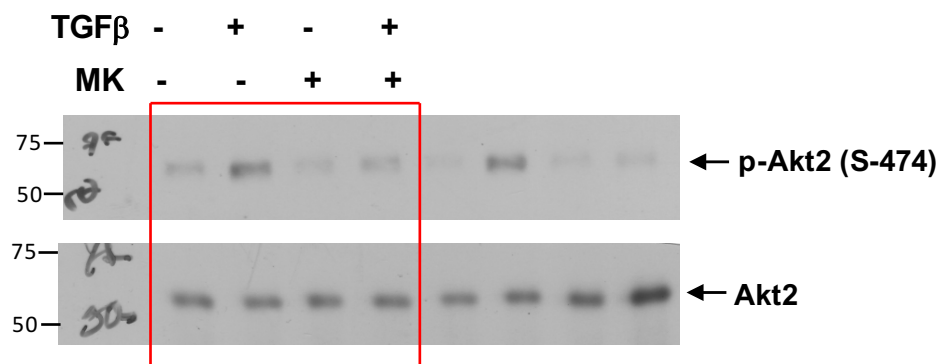

**S13A Fig.**

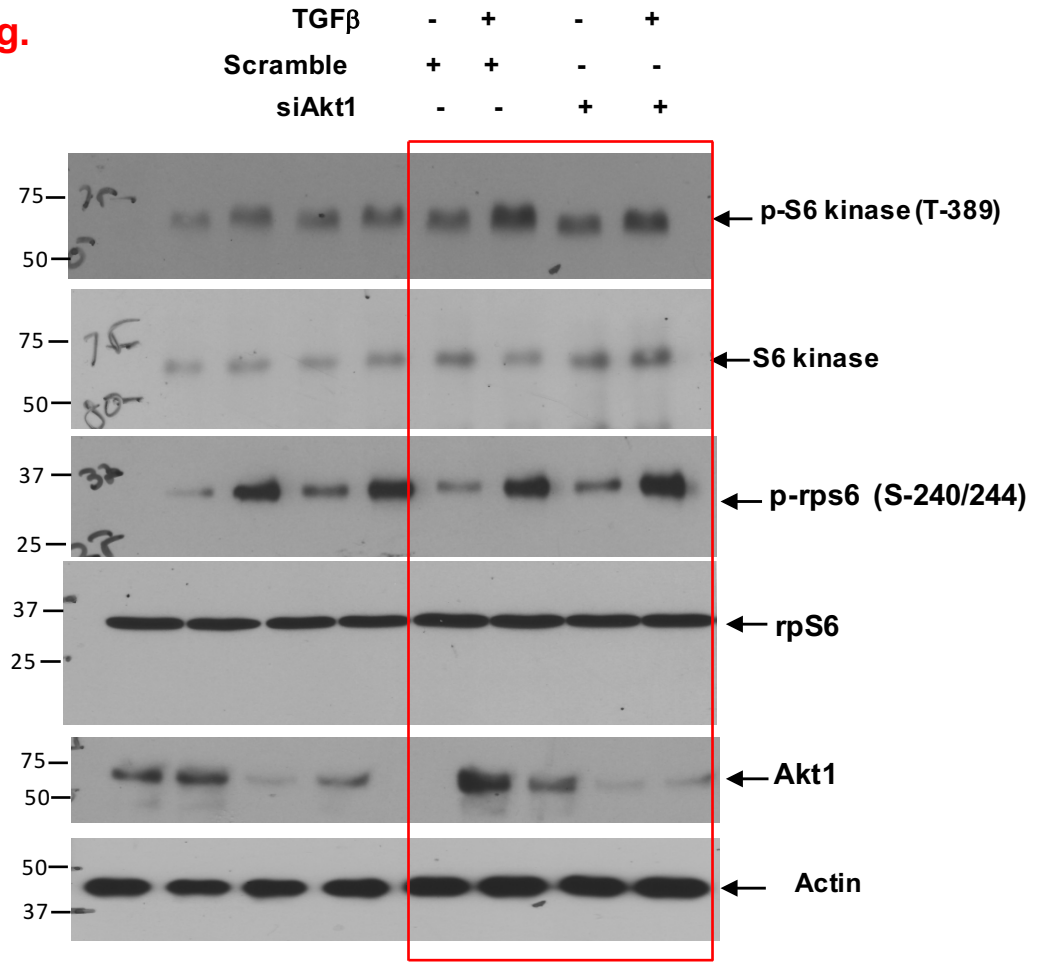

**S13B Fig.**

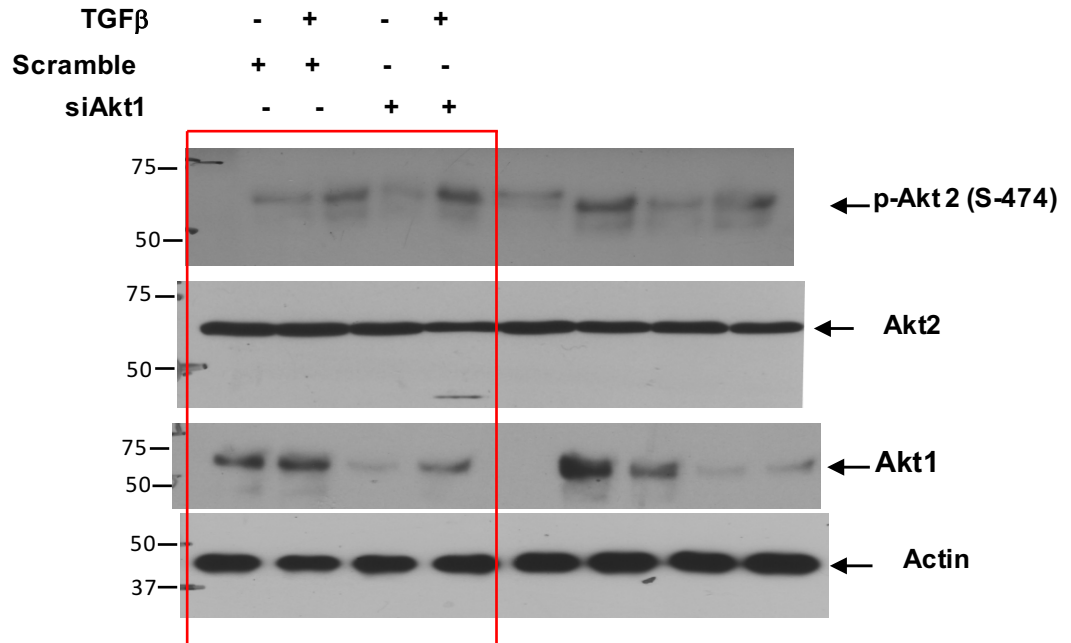

Supplement: pone.0207285.s014.pdf [file pone.0207285.s014.pdf]
